# Supplementary material for: Epithelial to mesenchymal transition (EMT) is associated with attenuation of succinate dehydrogenase (SDH) in breast cancer through reduced expression of SDHC
Source: PubMed Central journal article supplement (PMC6544948; doi:10.1186/s40170-019-0197-8), 2019-06-01
Supplement: 40170_2019_197_MOESM2_ESM.pdf [file 40170_2019_197_MOESM2_ESM.pdf]

Figure S1

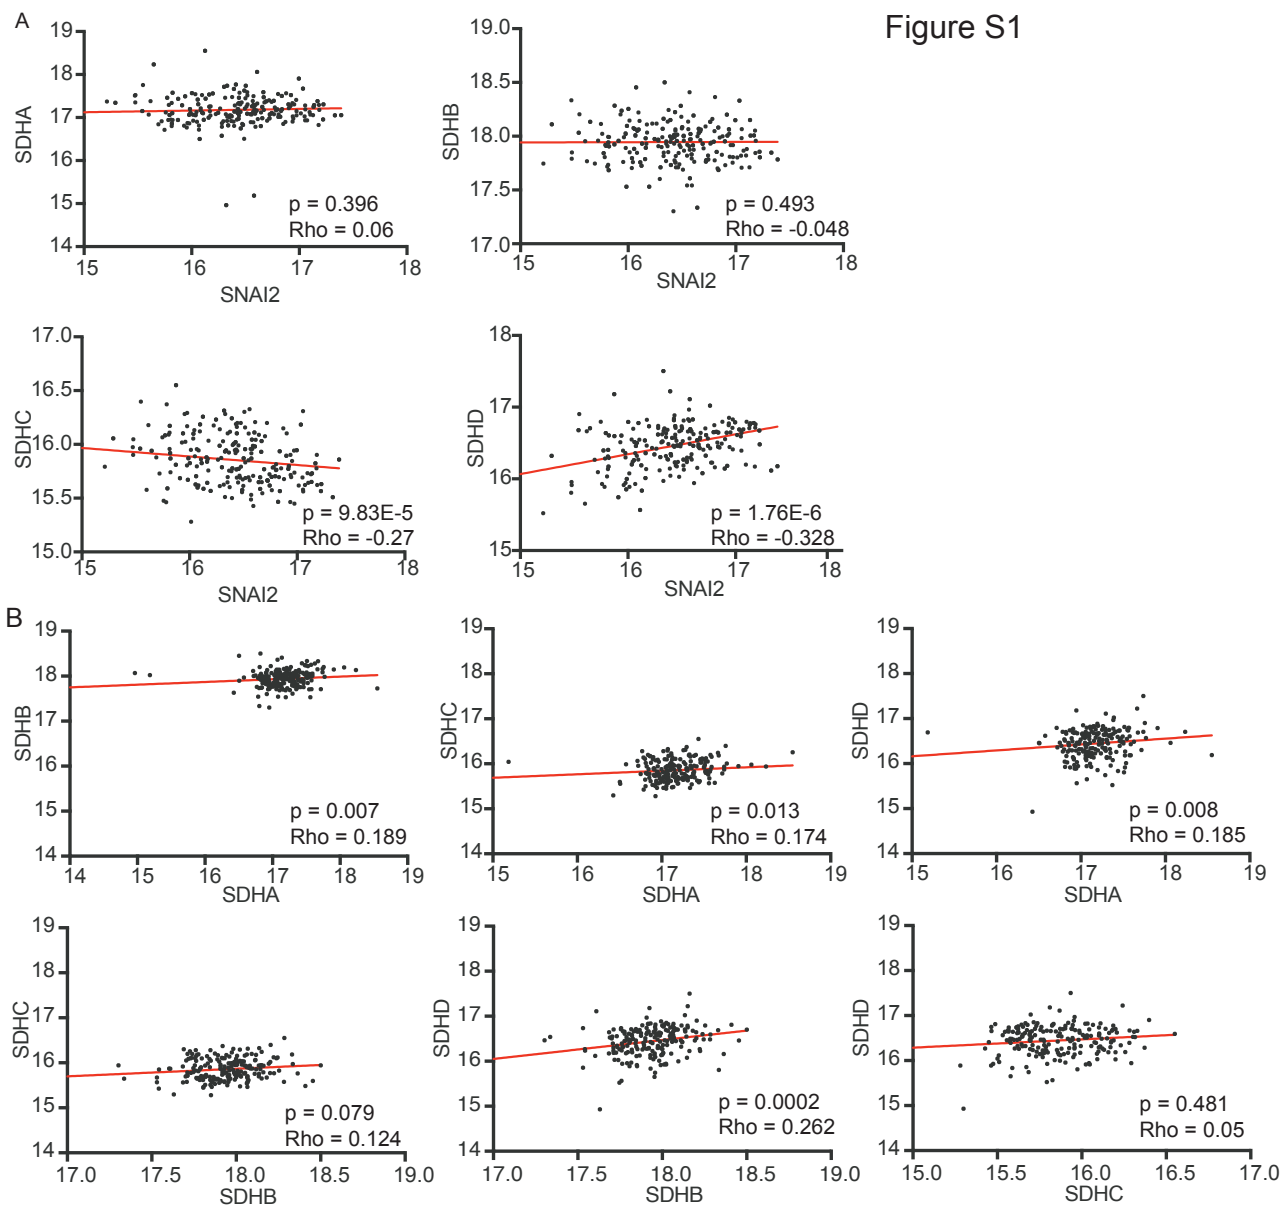

Figure S1: (A) Correlation analysis (Spearman) between the expression of the four SDH subunits relative to SNAI2 in the n=204 breast cancer cohort. (B) Correlation analysis (Spearman) between the individual SDH subunits in the n=204 breast cancer cohort.

A

Homo sapiens chromosome 1, GRCh38.p7 Primary Assembly

Sequence ID: [NC\\_000001.11](#) Length: 248956422 Number of Matches: 1Range 1: 161328241 to 161328620 [GenBank](#) [Graphics](#) [Next Match](#) [Previous Match](#)

| Score         | Expect | Identities   | Gaps       | Strand    |
|---------------|--------|--------------|------------|-----------|
| 614 bits(332) | 8e-173 | 366/380(96%) | 11/380(2%) | Plus/Plus |

Features: [succinate dehydrogenase cytochrome b560 subunit, mitochon...](#)  
[succinate dehydrogenase cytochrome b560 subunit, mitochon...](#)

|       |           |                                                              |           |
|-------|-----------|--------------------------------------------------------------|-----------|
| Query | 546       | attcgccctctcggcctcccaaaagagctgagattacaggctgagcaaccatgctctgc  | 605       |
| Sbjct | 161328241 | ATCGCCCGCCTCGGCCTCCCAAAGAGCTGAGATTACAGGCCTGAGCAACCATGCTCTGC  | 161328300 |
| Query | 606       | TTGGTATTGCAAAATATTGACTTAATAAAAACGTTATGCAAAATATTAACCAAGTTTACT | 665       |
| Sbjct | 161328301 | TTGGTATTGCAAAATATTGACTTAATAAAAACGTTATGCAAAATATTAACCAAGTTTACT | 161328360 |
| Query | 666       | TTTAGTATTATTTCAAACGGTCTGGTTTTATTTTAGTCTGTCCTTTGGGAACACGGCC   | 725       |
| Sbjct | 161328361 | TTTAGTATTATTTCAAACGGTCTGGTTTTATTTTAGTCTGTCCTTTGGGAACACGGCC   | 161328420 |
| Query | 726       | AAAGAGAGATGGAGCGGTTCTGGAATAAGAATATAGGTTCAAACCGTCTCT-----     | 778       |
| Sbjct | 161328421 | AAAGAGAGATGGAGCGGTTCTGGAATAAGAATATAGGTTCAAACCGTCTCTCTGTCTCCC | 161328480 |
| Query | 779       | ---TTACTACTACAGTAAGGAAGGATCTGGAGCCAGAGAATCTAGAGGTAGTGGGT     | 834       |
| Sbjct | 161328481 | CACATTACTACTACAGTAAGGAAGGATCTGGAGCCAGAGAATCTAGAGGTAGTGGGT    | 161328540 |
| Query | 835       | GAAAGTCTGAAGGTGATCTTTAGCCTACTTGATACTCCCTCACITTTACTCAACAA     | 894       |
| Sbjct | 161328541 | GAAAGTCTGAAGGTGATCTTTAGCCTACTTGATACTCCCTCACITTTACTCAACAA     | 161328600 |
| Query | 895       | AATACTGCTATGTAGATGAG 914                                     |           |
| Sbjct | 161328601 | AATACTGCTATGTAGATGAG 161328620                               |           |

B

Homo sapiens chromosome 11, alternate assembly CHM1\_1.1

Sequence ID: [NC\\_018922.2](#) Length: 134889443 Number of Matches: 1Range 1: 111840691 to 111841012 [GenBank](#) [Graphics](#) [Next Match](#) [Previous Match](#)

| Score         | Expect | Identities   | Gaps       | Strand    |
|---------------|--------|--------------|------------|-----------|
| 468 bits(518) | 5e-129 | 292/322(91%) | 29/322(9%) | Plus/Plus |

Features: [succinate dehydrogenase \[ubiquinone\] cytochrome b small s...](#)  
[succinate dehydrogenase \[ubiquinone\] cytochrome b small s...](#)

|       |           |                                                              |           |
|-------|-----------|--------------------------------------------------------------|-----------|
| Query | 64        | CTCTCGACTTCOCGGTTCACCCAGCAFTTCCACTTCCTCGTTTCTTCGTCGTCGTTGGGT | 123       |
| Sbjct | 111840691 | CTCTCGACTTCOCGGTTCACCCAGCAFTTCCACTTCCTCGTTTCTTCGTCGTCGTTGGGT | 111840750 |
| Query | 124       | GGGAATTGTCGCCTAAGTGGTTCOCGGTTCGATGACCTTGAGCCCTCAGGAACGAGA    | 183       |
| Sbjct | 111840751 | GGGAATTGTCGCCTAAGTGGTTCOCGGTTCGATGACCTTGAGCCCTCAGGAACGAGA    | 111840810 |
| Query | 184       | TGCGGGTCTCTGAGGGCTGAGTGCCTTTTCGGGTGCCTAG-----                | 225       |
| Sbjct | 111840811 | TGCGGGTCTCTGAGGGCTGAGTGCCTTTTCGGGTGCCTAGGAGGCCGAGGTGAGGGGT   | 111840870 |
| Query | 226       | -----GAGTCTTACGCTAGCCTCCAGCCAGGGAAGGGATGGAAGTGAAGAC          | 274       |
| Sbjct | 111840871 | CTTCCACCCCTGAGTCTTACGCTAGCCTCCAGCCAGGGAAGGGATGGAAGTGAAGAC    | 111840930 |
| Query | 275       | TCACTGCCGGTGGGAGATCTCTTGAGGAGAAGAAAATACCGAAATCACAGCAATGACC   | 334       |
| Sbjct | 111840931 | TCACTGCCGGTGGGAGATCTCTTGAGGAGAAGAAAATACCGAAATCACAGCAATGACC   | 111840990 |
| Query | 335       | ACTGTAGTCTAGGGTCCAGAT 356                                    |           |
| Sbjct | 111840991 | ACTGTAGTCTAGGGTCCAGAT 111841012                              |           |

C

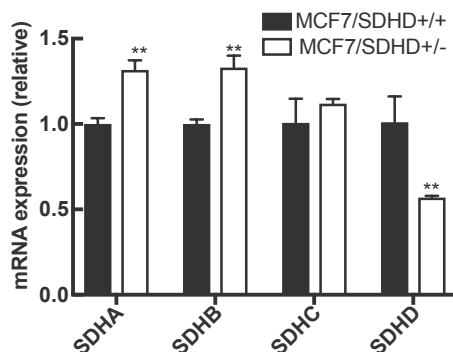

Figure S2: (A) Sequence alignment of the SDHC gene in CRISPR/Cas9-modified MCF7 cells and the SDHC wild-type gene, revealing an 11bp frameshift deletion. (B) Sequence alignment of the SDHD gene in CRISPR/Cas9-modified MCF7 cells and the SDHD wild-type gene, revealing an 29bp frameshift deletion. (C) qPCR analysis of SDHA-D in MCF7 SDHD +/- cells.

Figure S3

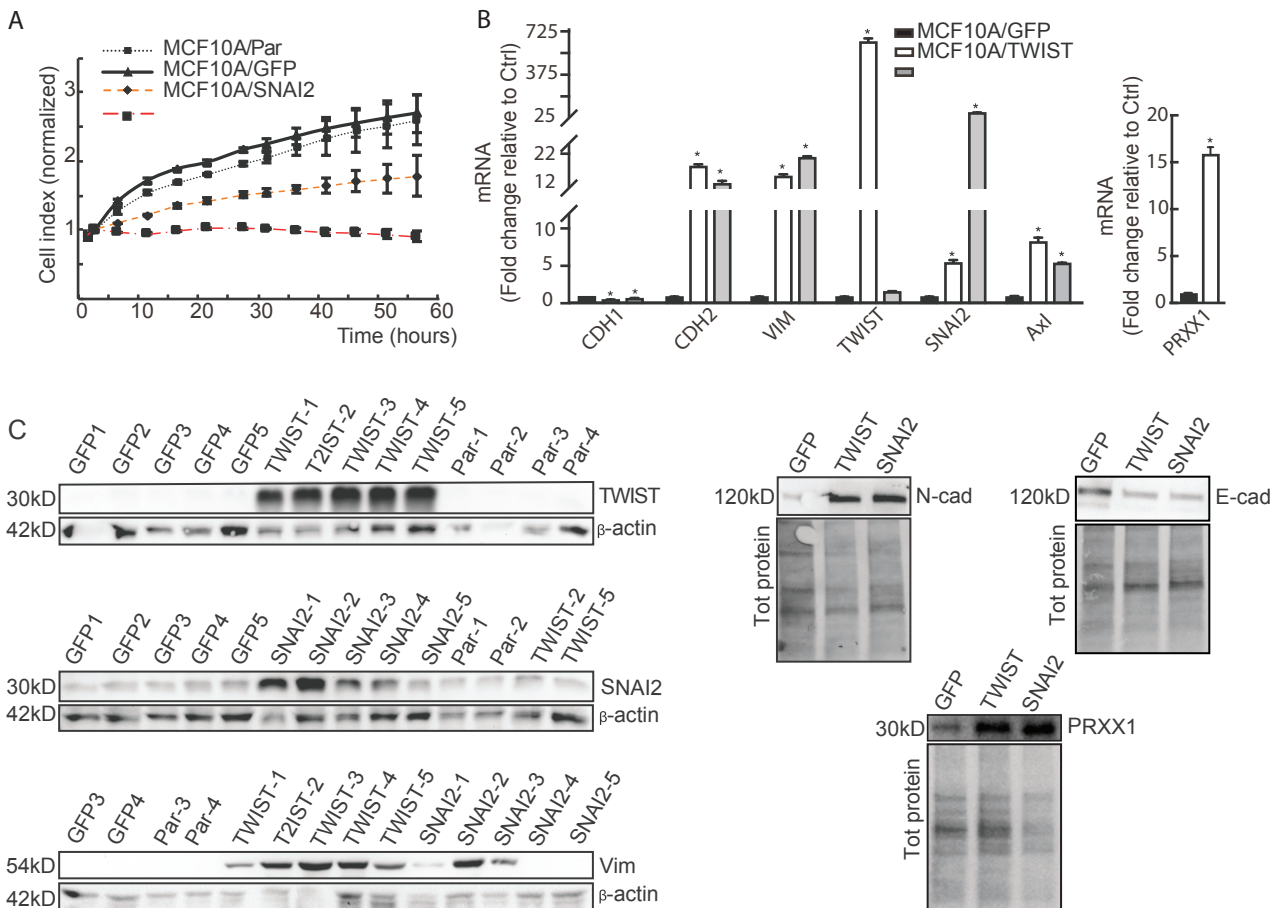

Figure S3: Characterization of the EMT process in MCF10A cells upon overexpression of TWIST and SNAI2 (Slug). (A) Cell proliferation was measured by the use of the xCelligence RTCA DP instrument (ACEA Bioscience, San Diego, CA), which measures cellular impedance (expressed as “Cell index”). The cells (MCF10A, MCF10A/GFP, MCF10A/TWIST, MCF10A/SNAI2) were seeded at a density of 10 000 cells/well. (B) mRNA and (C) protein expression of TWIST and SNAI2, and epithelial (E-cadherin (CDH1)) and mesenchymal (N-cadherin (CDH2), Vimentin (VIM), Twist, SNAI2, Axl and PRXX1) markers. The numbers at the end of the sample name in the western blots refer to passage number after transduction.

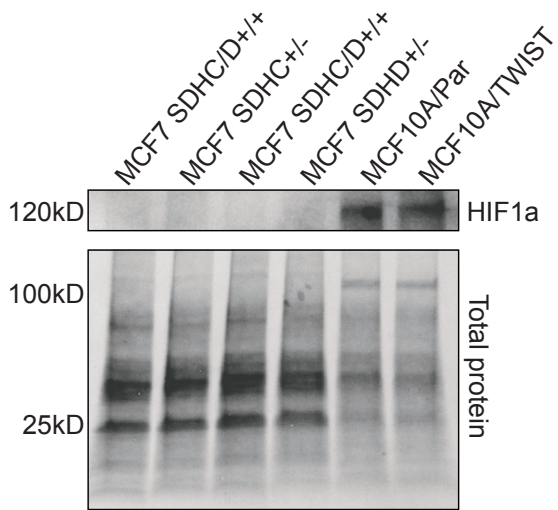

Figure S4: Western blot analysis of HIF1 $\alpha$  in MCF7 SDHC/D+/+, MCF7 SDHC+/-, and MCF7 SDHD+/- cells, and in MCF10A/Par and MCF10A/TWIST cells.

Table S1

A

| Category           | SDHAvsEMT | SDHAvsEMT | SDHBvsEMT | SDHBvsEMT | SDHCvsEMT | SDHCvsEMT | SDHDvsEMT | SDHDvsEMT |
|--------------------|-----------|-----------|-----------|-----------|-----------|-----------|-----------|-----------|
|                    | Spear.Rho | Spear.pv  | Spear.Rho | Spear.pv  | Spear.Rho | Spear.pv  | Spear.Rho | Spear.pv  |
| Breast cancer cell | -0.1578   | 0.2686    | 0.0957    | 0.504     | -0.5174   | 0.0001    | -0.0353   | 0.8060    |

B

| Disease                          | SDHAvsEMT | SDHAvsEMT | SDHBvsEMT | SDHBvsEMT | SDHCvsEMT | SDHCvsEMT | SDHDvsEMT | SDHDvsEMT |
|----------------------------------|-----------|-----------|-----------|-----------|-----------|-----------|-----------|-----------|
|                                  | Spear.Rho | Spear.pv  | Spear.Rho | Spear.pv  | Spear.Rho | Spear.pv  | Spear.Rho | Spear.pv  |
| Breast invasive carcinoma (BRCA) | -0.0777   | 0.0068    | -0.0611   | 0.0335    | -0.3373   | 1.2E-33   | 0.3676    | 4.51E-40  |

Table S1: Spearman correlation analysis was applied to assess associations between SDH subunit gene expression and EMT315 score on (A) Encyclopedia breast cancer cell line collection (56 cell lines) and for (B)TCGA RNA-seq extracted from GDAC version 2018\_01\_28 from breast cancer carcinoma cohort (7).

Table S2

| Gene        | SDHA   |         | SDHB   |         | SDHC   |          | SDHD   |          | SNAI2   |          | TWIST1 |          | EMT    |          |
|-------------|--------|---------|--------|---------|--------|----------|--------|----------|---------|----------|--------|----------|--------|----------|
|             | Rho    | pv      | Rho    | pv      | Rho    | pv       | Rho    | pv       | Rho     | pv       | Rho    | pv       | Rho    | pv       |
| SLC2A1      | 0,002  | 9,0E-01 | 0,063  | 6,7E-05 | 0,023  | 1,43E-01 | -0,068 | 1,70E-05 | -0,0953 | 1,45E-09 | -0,048 | 2,22E-03 | 0,060  | 1,31E-04 |
| SLC2A3 (GI  | -0,012 | 4,4E-01 | -0,070 | 8,8E-06 | -0,160 | 1,84E-24 | 0,102  | 9,68E-11 | 0,2313  | 6,79E-50 | 0,324  | 1,28E-98 | 0,540  | 3,5E-302 |
| HK1         | 0,151  | 6,5E-22 | 0,084  | 1,1E-07 | 0,127  | 6,01E-16 | -0,091 | 7,16E-09 | -0,0236 | 1,35E-01 | -0,013 | 0,423948 | -0,308 | 4,59E-89 |
| HK2         | 0,147  | 6,4E-21 | 0,087  | 4,0E-08 | 0,098  | 5,17E-10 | -0,031 | 4,80E-02 | -0,1503 | 1,01E-21 | -0,024 | 0,125805 | -0,192 | 9,43E-35 |
| PKM2        | 0,203  | 1,2E-38 | 0,260  | 4,0E-63 | 0,166  | 3,69E-26 | 0,018  | 2,46E-01 | 0,0434  | 0,00596  | -0,020 | 2,13E-01 | -0,066 | 2,86E-05 |
| LDHA        | 0,126  | 1,2E-15 | 0,237  | 1,7E-52 | 0,181  | 7,85E-31 | 0,162  | 4,05E-25 | 0,0413  | 8,83E-03 | -0,029 | 6,61E-02 | 0,008  | 6,14E-01 |
| PDK1        | 0,069  | 1,1E-05 | 0,071  | 7,6E-06 | 0,020  | 1,95E-01 | 0,027  | 0,084600 | -0,1724 | 3,87E-28 | -0,170 | 2,00E-27 | 0,244  | 1,92E-55 |
| SLC16A3     | 0,041  | 9,7E-03 | 0,145  | 2,0E-20 | 0,089  | 1,56E-08 | -0,071 | 6,08E-06 | 0,0590  | 0,00018  | 0,088  | 2,74E-08 | 0,183  | 1,64E-31 |
| SLC16A4     | -0,151 | 7,5E-22 | -0,051 | 1,2E-03 | 0,043  | 6,41E-03 | 0,151  | 8,85E-22 | 0,2441  | 1,61E-55 | 0,128  | 4,64E-16 | -0,025 | 1,13E-01 |
| VEGFA       | 0,076  | 1,2E-06 | 0,067  | 2,1E-05 | 0,093  | 4,00E-09 | 0,074  | 3,11E-06 | 0,0412  | 0,00910  | -0,016 | 3,26E-01 | -0,006 | 6,63E-01 |
| SNAI1       | -0,023 | 1,4E-01 | -0,156 | 3,6E-23 | -0,099 | 3,23E-10 | -0,138 | 1,71E-18 | -0,0459 | 3,64E-03 | -0,005 | 7,65E-01 | 0,252  | 2,84E-59 |
| SNAI2       | -0,095 | 1,6E-09 | -0,045 | 4,7E-03 | -0,062 | 9,56E-05 | 0,250  | 2,97E-58 | 1,0000  | 0        | 0,487  | 8,1E-238 | 0,351  | 5,7E-117 |
| TWIST1      | -0,043 | 6,3E-03 | -0,126 | 9,3E-16 | -0,123 | 5,09E-15 | 0,059  | 0,000205 | 0,4867  | 8,1E-238 | 1,000  | 0,0E+00  | 0,280  | 3,00E-73 |
| VIM         | 0,009  | 5,5E-01 | -0,007 | 6,6E-01 | -0,066 | 2,51E-05 | 0,215  | 2,29E-43 | 0,5766  | 0        | 0,377  | 1,5E-135 | 0,600  | 0,0E+00  |
| MMP2        | -0,066 | 3,2E-05 | -0,224 | 6,5E-47 | -0,158 | 7,90E-24 | 0,030  | 0,060545 | 0,6638  | 0,0E+00  | 0,540  | 1,9E-302 | 0,273  | 1,14E-69 |
| MMP9        | 0,045  | 4,2E-03 | 0,055  | 5,2E-04 | -0,088 | 2,01E-08 | 0,007  | 6,69E-01 | 0,1367  | 3,30E-18 | 0,117  | 1,25E-13 | 0,384  | 1,8E-141 |
| MMP14       | -0,112 | 1,2E-12 | -0,281 | 6,9E-74 | -0,086 | 5,20E-08 | -0,193 | 4,87E-35 | 0,3520  | 2,1E-117 | 0,217  | 4,69E-44 | 0,220  | 4,71E-45 |
| PDK4        | -0,099 | 2,7E-10 | -0,075 | 2,0E-06 | -0,039 | 1,25E-02 | 0,056  | 0,000389 | 0,1151  | 2,60E-13 | 0,019  | 2,29E-01 | 0,069  | 1,19E-05 |
| PPARGC1F    | 0,027  | 8,4E-02 | -0,083 | 1,2E-07 | -0,058 | 2,50E-04 | 0,001  | 0,943557 | 0,0402  | 1,08E-02 | 0,056  | 3,60E-04 | 0,181  | 9,54E-31 |
| CPT2        | 0,201  | 1,0E-37 | 0,330  | 2E-102  | 0,263  | 2,16E-64 | 0,082  | 2,33E-07 | -0,1565 | 2,03E-23 | -0,187 | 5,82E-33 | -0,306 | 8,03E-88 |
| SLC24A4 (GI | -0,013 | 4,1E-01 | -0,183 | 1,1E-31 | -0,105 | 2,60E-11 | -0,234 | 7,59E-51 | -0,1735 | 1,73E-28 | -0,087 | 3,37E-08 | -0,001 | 9,32E-01 |
| NRF1        | -0,164 | 1,1E-25 | -0,260 | 3,9E-63 | -0,130 | 1,45E-16 | -0,083 | 1,46E-07 | 0,0070  | 0,65835  | 0,078  | 6,43E-07 | 0,020  | 1,97E-01 |
| TFAM        | 0,037  | 2,0E-02 | 0,286  | 2,7E-76 | 0,200  | 1,70E-37 | 0,398  | 3,3E-152 | 0,0176  | 0,26405  | -0,031 | 0,04850  | 0,058  | 2,12E-04 |
| PPARGC1F    | 0,027  | 8,4E-02 | -0,083 | 1,2E-07 | -0,058 | 0,00025  | 0,001  | 9,44E-01 | 0,0402  | 1,08E-02 | 0,056  | 0,00036  | 0,181  | 9,54E-31 |
| TOMM20      | 0,071  | 6,1E-06 | 0,215  | 2,8E-43 | 0,396  | 9,6E-151 | 0,195  | 1,00E-35 | -0,0208 | 0,187073 | -0,104 | 3,44E-11 | -0,196 | 5,17E-36 |
| SLC25A4     | 0,204  | 4,7E-39 | 0,291  | 5,7E-79 | 0,220  | 3,44E-45 | -0,011 | 0,503160 | -0,0858 | 5,14E-08 | -0,037 | 2,04E-02 | -0,388 | 2,2E-144 |
| ATP1B1      | -0,087 | 3,8E-08 | -0,074 | 2,6E-06 | 0,131  | 7,50E-17 | 0,085  | 5,83E-08 | 0,0984  | 4,21E-10 | 0,033  | 0,035276 | -0,167 | 1,44E-26 |
| VDAC1       | 0,253  | 8,2E-60 | 0,400  | 4E-154  | 0,378  | 9,4E-137 | 0,100  | 2,45E-10 | -0,0576 | 2,59E-04 | -0,108 | 6,18E-12 | -0,222 | 4,70E-46 |
| MFN1        | 0,085  | 6,9E-08 | 0,248  | 3,9E-57 | 0,139  | 9,36E-19 | 0,261  | 1,66E-63 | 0,0828  | 1,51E-07 | -0,020 | 2,10E-01 | 0,009  | 0,560201 |
| MFN2        | 0,176  | 2,7E-29 | 0,327  | 6E-101  | 0,043  | 5,91E-03 | -0,047 | 3,19E-03 | -0,1123 | 9,79E-13 | -0,052 | 0,00096  | -0,145 | 3,07E-20 |
| OPA1        | -0,003 | 8,7E-01 | 0,060  | 1,3E-04 | 0,071  | 6,84E-06 | 0,108  | 5,92E-12 | 0,0323  | 4,10E-02 | -0,007 | 6,40E-01 | -0,014 | 0,359938 |
| DNM1L       | 0,177  | 1,0E-29 | 0,400  | 3E-154  | 0,263  | 1,01E-74 | 0,197  | 2,79E-36 | -0,0233 | 0,139847 | -0,098 | 5,10E-10 | 0,039  | 1,28E-02 |
| FIS1        | 0,103  | 5,8E-11 | 0,268  | 5,5E-67 | 0,280  | 5,60E-73 | 0,087  | 3,93E-08 | 0,0045  | 0,774329 | -0,016 | 3,12E-01 | -0,290 | 1,03E-78 |
| SOD1        | 0,199  | 3,6E-37 | 0,417  | 5E-169  | 0,313  | 8,70E-92 | 0,091  | 6,86E-09 | -0,1501 | 1,17E-21 | -0,119 | 3,09E-14 | -0,281 | 1,29E-73 |
| SOD2        | 0,123  | 4,8E-15 | 0,242  | 1,9E-54 | 0,089  | 1,82E-08 | 0,241  | 4,45E-54 | 0,0572  | 2,87E-04 | 0,018  | 2,64E-01 | 0,553  | 0,0E+00  |
| GPX1        | 0,038  | 1,7E-02 | 0,272  | 2,9E-69 | 0,108  | 8,49E-12 | 0,133  | 2,85E-17 | 0,0596  | 0,000160 | 0,052  | 0,00092  | 0,104  | 4,0E-11  |
| GPX2        | -0,176 | 3,5E-29 | -0,309 | 2,7E-89 | -0,242 | 1,55E-54 | -0,219 | 7,78E-45 | -0,1002 | 2,00E-10 | -0,038 | 1,64E-02 | -0,035 | 2,75E-02 |
| GPX3        | -0,017 | 2,7E-01 | -0,057 | 2,7E-04 | -0,082 | 2,29E-07 | 0,073  | 3,97E-06 | 0,2459  | 2,44E-56 | 0,242  | 1,25E-54 | 0,294  | 8,09E-81 |
| GPX4        | 0,093  | 3,8E-09 | 0,217  | 8,3E-44 | 0,139  | 7,20E-19 | -0,033 | 3,88E-02 | -0,0999 | 2,29E-10 | -0,034 | 0,02971  | -0,386 | 1,0E-142 |
| GPX5        | -0,100 | 2,4E-10 | -0,303 | 2,8E-86 | -0,172 | 5,36E-28 | -0,258 | 4,25E-62 | -0,1871 | 6,11E-33 | -0,109 | 4,77E-12 | -0,017 | 0,272220 |
| GPX7        | 0,002  | 9,1E-01 | 0,049  | 2,1E-03 | -0,026 | 0,096863 | 0,232  | 2,76E-50 | 0,4882  | 1,5E-239 | 0,336  | 2,6E-106 | 0,580  | 0,0E+00  |
| GPX8        | -0,060 | 2,7E-02 | 0,063  | 2,1E-02 | 0,109  | 6,49E-05 | 0,262  | 1,72E-22 | 0,5077  | 5,11E-89 | 0,258  | 6,23E-22 | 0,178  | 4,44E-11 |
| GSR         | 0,125  | 2,3E-15 | 0,138  | 1,5E-18 | 0,184  | 6,16E-32 | 0,057  | 0,000328 | -0,0721 | 4,86E-06 | -0,123 | 6,46E-15 | -0,230 | 1,61E-49 |
| CAT         | 0,048  | 2,5E-03 | 0,109  | 3,9E-12 | 0,151  | 7,93E-22 | 0,326  | 5,6E-100 | 0,1630  | 2,67E-25 | 0,045  | 4,66E-03 | 0,075  | 2,01E-06 |
| PRDX1       | 0,277  | 9,2E-72 | 0,467  | 2E-216  | 0,258  | 7,05E-62 | 0,126  | 1,16E-15 | -0,1448 | 2,93E-20 | -0,159 | 3,39E-24 | -0,096 | 1,21E-09 |
| PRDX2       | 0,198  | 9,7E-37 | 0,313  | 3,3E-92 | 0,213  | 3,26E-42 | 0,057  | 0,000297 | -0,2172 | 4,72E-44 | -0,148 | 4,82E-21 | -0,366 | 1,3E-127 |
| PRDX3       | 0,124  | 3,9E-15 | 0,356  | 4E-120  | 0,318  | 7,43E-95 | 0,244  | 1,14E-55 | -0,0337 | 0,032918 | -0,121 | 1,85E-14 | -0,453 | 5,0E-202 |
| PRDX4       | 0,164  | 1,1E-25 | 0,342  | 2E-110  | 0,218  | 2,72E-44 | 0,223  | 1,55E-46 | 0,0677  | 1,76E-05 | 0,001  | 9,63E-01 | 0,224  | 6,93E-47 |
| PRDX5       | 0,033  | 2,3E-01 | 0,205  | 2,7E-14 | 0,125  | 4,21E-06 | 0,176  | 7,37E-11 | 0,0055  | 0,840649 | -0,060 | 0,027751 | -0,053 | 0,05155  |
| PRDX6       | 0,192  | 1,0E-34 | 0,183  | 1,3E-31 | 0,422  | 1,1E-172 | 0,087  | 3,73E-08 | -0,0669 | 2,23E-05 | -0,015 | 0,353144 | 0,088  | 1,96E-08 |
| TXN         | 0,182  | 3,7E-31 | 0,384  | 2E-141  | 0,229  | 5,45E-49 | 0,192  | 1,69E-34 | -0,0946 | 1,92E-09 | -0,038 | 1,52E-02 | -0,047 | 2,72E-03 |
| TXN2        | 0,150  | 1,4E-21 | 0,083  | 1,6E-07 | 0,085  | 7,32E-08 | 0,042  | 7,36E-03 | -0,0806 | 3,16E-07 | -0,002 | 9,04E-01 | -0,143 | 7,91E-20 |
| TXNRD1      | 0,176  | 2,2E-29 | 0,308  | 4,6E-89 | 0,100  | 2,14E-10 | 0,124  | 3,52E-15 | -0,1007 | 1,63E-10 | -0,087 | 3,76E-08 | 0,071  | 7,50E-06 |
| TXNRD2      | 0,104  | 4,9E-11 | -0,040 | 1,1E-02 | 0,076  | 1,30E-06 | -0,178 | 8,42E-30 | -0,1949 | 1,20E-35 | -0,075 | 2,13E-06 | -0,324 | 6,37E-99 |
| TXNRD3      | -0,023 | 1,4E-01 | -0,054 | 6,8E-04 | 0,049  | 0,00183  | -0,022 | 1,55E-01 | 0,0214  | 1,75E-01 | 0,003  | 8,70E-01 | 0,186  | 1,09E-32 |
| BECN1       | 0,008  | 6,0E-01 | 0,269  | 1,0E-67 | 0,205  | 2,50E-39 | 0,129  | 2,64E-16 | -0,0048 | 0,76329  | -0,053 | 7,50E-04 | -0,404 | 1,9E-157 |
| PINK1       | 0,001  | 9,4E-01 | 0,205  | 3,3E-39 | -0,050 | 0,001571 | -0,011 | 0,468433 | 0,0259  | 0,10085  | -0,011 | 5,00E-01 | -0,094 | 2,82E-09 |
| PARK2       | -0,120 | 2,4E-14 | -0,225 | 3,0E-47 | -0,144 | 4,02E-20 | -0,173 | 1,96E-28 | -0,1276 | 4,88E-16 | -0,071 | 6,20E-06 | 0,005  | 7,42E-01 |
| BNIP3       | 0,125  | 1,9E-15 | 0,245  | 4,4E-56 | 0,174  | 9,31E-29 | 0,178  | 5,42E-30 | -0,0546 | 5,34E-04 | -0,043 | 6,67E-03 | -0,154 | 7,39E-23 |
| BNIP3L      | -0,022 | 1,6E-01 | 0,102  | 1,1E-10 | 0,142  | 1,32E-19 | 0,123  | 5,36E-15 | 0,1308  | 9,02E-17 | 0,062  | 7,57E-05 | -0,124 | 3,36E-15 |
| ZNF746      | 0,075  | 6,2E-03 | -0,017 | 5,3E-01 | -0,003 | 0,902185 | -0,125 | 4,02E-06 | -0,0014 | 0,959629 | 0,010  | 0,72092  | -0,040 | 0,14585  |
| ULK1        | 0,081  | 2,9E-07 | -0,088 | 2,8E-08 | 0,029  | 7,06E-02 | -0,366 | 9,3E-128 | -0,1373 | 0,463843 | -0,007 | 0,63843  | -0,341 | 5,2E-110 |
| ULK2        | -0,057 | 2,8E-04 | 0,073  | 3,2E-06 | 0,091  | 7,23E-09 | 0,012  | 0,456505 | 0,1150  | 2,73E-13 | 0,048  | 2,36E-03 | -0,231 | 1,28E-49 |

Table S2: Gene expression (mRNA) correlation analysis (Spearman) between SDH subunits and listed genes in the Affymetrix breast cancer patient meta cohort (n=3,992)

A

Probes all from applied biosystems

| Gene name                                                             | Gene   | Catalog number |
|-----------------------------------------------------------------------|--------|----------------|
| AXL receptor tyrosine kinase                                          | AXL    | hs01064444     |
| Carnitine palmitoyltransferase 1A                                     | CPT1A  | hs00912671     |
| Cytochrome c                                                          | CYCS   | hs01588974     |
| Dynamin 1 like                                                        | DNM1L  | hs01552605     |
| E-cadherin                                                            | CHD1   | hs01023894     |
| Eukaryotic 18S rRNA Endogenous Control                                | 18S    | 4310893E       |
| Mitochondrially encoded NADH dehydrogenase 1                          | MT-ND1 | hs02596873     |
| Mitofusin 1                                                           | MFN1   | hs00966851     |
| Mitofusin 2                                                           | MFN2   | hs00208382     |
| N-cadherin                                                            | CDH2   | hs00983056     |
| OPA1, mitochondrial dynamin like GTPase                               | OPA1   | hs01047018     |
| Parkin RBR E3 ubiquitin protein ligase                                | PARK2  | hs01038325     |
| PTEN induced putative kinase 1                                        | PINK1  | hs00260868     |
| Snail family zinc finger 2                                            | SNAI2  | hs00950344     |
| Succinate dehydrogenase complex, subunit A, flavoprotein (Fp)         | SDHA   | hs00417200     |
| Succinate dehydrogenase complex, subunit B, iron sulfur (Ip)          | SDHB   | hs01042482     |
| Succinate dehydrogenase complex, subunit C, integral membrane protein | SDHC   | hs01698067     |
| Succinate dehydrogenase complex subunit D                             | SDHD   | hs00829723     |
| Vimentin                                                              | VIM    | hs00185584     |

B

Table S3

| Antibody                                                                      | Catalog number | Company                       |
|-------------------------------------------------------------------------------|----------------|-------------------------------|
| Anti-DRP1 antibody                                                            | ab56788        | Abcam                         |
| Anti-N Cadherin antibody                                                      | ab18203        | Abcam                         |
| Anti-SDHC antibody                                                            | ab155999       | Abcam                         |
| Anti-SDHA antibody                                                            | ab14715        | Abcam                         |
| Anti-SDHB antibody                                                            | ab14714        | Abcam                         |
| Anti-Vimentin antibody                                                        | ab8978         | Abcam                         |
| Anti-Vimentin antibody                                                        | ab92547        | Abcam                         |
| E-Cadherin                                                                    | 3195           | Cell Signaling                |
| E-Cadherin                                                                    | ab40772        | Abcam                         |
| E-Cadherin                                                                    | 14472          | Cell Signaling                |
| Goat anti-Mouse IgG (H+L) Cross-Adsorbed Secondary Antibody, Alexa Fluor 594  | a11005         | Thermo Fisher                 |
| Goat anti-Rabbit IgG (H+L) Cross-Adsorbed Secondary Antibody, Alexa Fluor 647 | a21244         | Thermo Fisher                 |
| PGC1 alpha                                                                    | sc-13067       | Santa Cruz                    |
| Purified Mouse Anti-OPA1                                                      | 612606         | BD Transduction Laboratories™ |
| Tom20 Antibody (FL-145)                                                       | sc-11415       | Santa Cruz Biotech,           |
| HIF1a Antibody                                                                | #3716          | Cell Signaling                |

C

| Dye                                          | Catalog number | Company       |
|----------------------------------------------|----------------|---------------|
| Alexa Fluor™ 555 Phalloidin                  | A34055         | Thermo Fisher |
| Hoechst                                      | 33342          | Thermo Fisher |
| ProLong™ Diamond Antifade Mountant with DAPI | P36962         | Thermo Fisher |
| Pyronin Y                                    | 213519         | Sigma         |

Table S3: (A) Probes used in experiments presented. (B) Antibodies used in experiments presented. (C) Probes and dyes used in experiments presented.
